# Supplementary material
Source: publisher site journal article supplement (https://www.kjim.org/upload/media/kjim-2020-634-suppl3.pdf)
Supplement: Supplementary file 1 [file kjim-2020-634-suppl3.pdf]

**Supplementary Table 3. Cox's regression analysis seeking risk factors for thrombosis in polycythemia vera (n = 124)**

| Variable                            | Univariate analysis |           |         |
|-------------------------------------|---------------------|-----------|---------|
|                                     | HR                  | 95% CI    | p value |
| Age > 60 years                      | 1.51                | 0.83–2.71 | 0.183   |
| Male sex                            | 0.81                | 0.44–1.45 | 0.489   |
| WBC > 12.0 × 10 <sup>9</sup> /L     | 1.04                | 0.50–2.16 | 0.914   |
| Platelet > 450 × 10 <sup>9</sup> /L | 0.80                | 0.39–1.66 | 0.552   |
| Positive JAK2V617F                  | 1.32                | 0.75–2.38 | 0.351   |
| Hypertension                        | 0.92                | 0.69–1.23 | 0.583   |
| Diabetes mellitus                   | 2.04                | 1.09–3.82 | 0.026   |
| Chronic kidney disease              | 0.91                | 0.45–1.83 | 0.784   |
| Smoking                             | 1.26                | 0.71–2.23 | 0.428   |

HR, hazard ratio; CI, confidence interval; WBC, white blood cell; JAK2, Janus kinase 2.
